# Supplementary material
Source: publisher site journal article supplement (https://www.spandidos-publications.com/7789/downloadSupplementary)
Supplement: Supplementary file 1 [file downloadSupplementary]

**Table SI.** General information of patients with colorectal neuroendocrine carcinoma.

| Parameters                         | Group                   | N   | %    |
|------------------------------------|-------------------------|-----|------|
| Total                              | -                       | 157 | 100  |
| Sex                                | Male                    | 102 | 65.0 |
|                                    | Female                  | 55  | 35.0 |
| Body mass index, kg/m <sup>2</sup> | ≤24.49                  | 77  | 49.0 |
|                                    | >24.49                  | 80  | 51.0 |
| Age, years                         | ≤55                     | 75  | 47.8 |
|                                    | >55                     | 82  | 52.2 |
| Surgical history                   | No                      | 125 | 79.6 |
|                                    | Yes                     | 32  | 20.4 |
| Hypertension                       | No                      | 131 | 83.4 |
|                                    | Yes                     | 26  | 16.6 |
| Diabetes                           | No                      | 141 | 89.8 |
|                                    | Yes                     | 16  | 10.2 |
| Primary site                       | Colon                   | 32  | 20.4 |
|                                    | Rectum                  | 125 | 79.6 |
| Gross type                         | Elevated type           | 72  | 45.9 |
|                                    | Ulcerative type         | 22  | 14.0 |
|                                    | Infiltrative type       | 63  | 40.1 |
| Tumor size, cm                     | ≤2                      | 81  | 51.6 |
|                                    | >2                      | 41  | 26.1 |
|                                    | Unknown                 | 35  | 22.3 |
| Treatment modality                 | Surgery                 | 128 | 81.5 |
|                                    | Non-surgery             | 29  | 18.5 |
| Histological type                  | NET-G1                  | 82  | 52.2 |
|                                    | NET-G2                  | 13  | 8.3  |
|                                    | NEC-G3                  | 54  | 34.4 |
|                                    | MANEC                   | 8   | 5.1  |
| Differentiation                    | Low-grade (G1)          | 83  | 52.9 |
|                                    | Intermediate-grade (G2) | 16  | 10.2 |
|                                    | High-grade (G3)         | 58  | 36.9 |
| Distant metastasis                 | No                      | 118 | 75.2 |
|                                    | Yes                     | 39  | 24.8 |
| Total number of lymph node         | ≤18                     | 37  | 23.6 |
|                                    | >18                     | 22  | 14.0 |
|                                    | Unknown                 | 98  | 62.4 |
| Positive number of lymph node      | ≤5                      | 40  | 25.5 |

|                            |          |     |      |
|----------------------------|----------|-----|------|
|                            | >5       | 19  | 12.1 |
|                            | Unknown  | 98  | 62.4 |
| TNM stage                  | Tis      | 4   | 2.5  |
|                            | I        | 63  | 40.1 |
|                            | II       | 5   | 3.2  |
|                            | III      | 28  | 17.8 |
|                            | IV       | 43  | 27.4 |
|                            | Unknown  | 14  | 8.9  |
| Perineural invasion        | No       | 145 | 92.4 |
|                            | Yes      | 12  | 7.6  |
| Vascular tumor thrombus    | No       | 134 | 85.4 |
|                            | Yes      | 23  | 14.6 |
| AE1/AE3                    | Negative | 86  | 54.8 |
|                            | Positive | 71  | 45.2 |
| Postoperative chemotherapy | No       | 119 | 75.8 |
|                            | Yes      | 38  | 24.2 |
| Postoperative radiotherapy | No       | 150 | 95.5 |
|                            | Yes      | 7   | 4.5  |

TNM, tumor-node-metastasis; NET, neuroendocrine tumor; NEC, neuroendocrine carcinoma; MANEC, mixed adenoendocrine carcinoma.

**Table SII.** Univariate and multivariate Cox proportional hazards regression model for disease-free survival in colorectal neuroendocrine carcinoma.

| Parameter                          | Group                   | Univariate |          |        |         | Multivariate |          |        |        |
|------------------------------------|-------------------------|------------|----------|--------|---------|--------------|----------|--------|--------|
|                                    |                         | P-value    | HR       | 95% CI |         | P-value      | HR       | 95% CI |        |
|                                    |                         |            |          | Low    | High    |              |          | Low    | High   |
| Sex                                | Male                    | 0.056      | 1 (Ref.) |        |         |              |          |        |        |
|                                    | Female                  |            | 2.542    | 0.975  | 6.626   |              |          |        |        |
| Body mass index, kg/m <sup>2</sup> | ≤24.49                  | 0.034      | 1 (Ref.) |        |         | 0.044        | 1 (Ref.) |        |        |
|                                    | >24.49                  |            | 2.848    | 1.082  | 7.494   |              | 2.002    | 1.018  | 3.939  |
| Age, years                         | ≤55                     | 0.013      | 1 (Ref.) |        |         | 0.001        | 1 (Ref.) |        |        |
|                                    | >55                     |            | 3.308    | 1.289  | 8.485   |              | 3.438    | 1.615  | 7.319  |
| Hypertension                       | No                      | 0.735      | 1 (Ref.) |        |         |              |          |        |        |
|                                    | Yes                     |            | 1.286    | 0.300  | 5.514   |              |          |        |        |
| Diabetes                           | No                      | 0.056      | 1 (Ref.) |        |         |              |          |        |        |
|                                    | Yes                     |            | 4.628    | 0.961  | 22.298  |              |          |        |        |
| Primary site                       | Colon                   | 0.266      | 1 (Ref.) |        |         |              |          |        |        |
|                                    | Rectum                  |            | 1.709    | 0.665  | 4.395   |              |          |        |        |
| Gross type                         | Elevated type           | 0.270      | 1 (Ref.) |        |         |              |          |        |        |
|                                    | Ulcerative type         |            | 3.183    | 0.783  | 12.939  |              |          |        |        |
|                                    | Infiltrative type       |            | 2.026    | 0.548  | 7.494   |              |          |        |        |
| Tumor size, cm                     | ≤2                      | 0.715      | 1 (Ref.) |        |         |              |          |        |        |
|                                    | >2                      |            | 1.785    | 0.432  | 7.375   |              |          |        |        |
|                                    | Unknown                 |            | 1.642    | 0.399  | 6.747   |              |          |        |        |
| Histological type                  | NET-G1                  | 0.030      | 1 (Ref.) |        |         |              |          |        |        |
|                                    | NET-G2                  |            | 0.865    | 0.040  | 18.635  |              |          |        |        |
|                                    | NEC-G3                  |            | 19.385   | 1.696  | 221.619 |              |          |        |        |
|                                    | MANEC                   |            | 3.961    | 0.289  | 54.309  |              |          |        |        |
| Differentiation                    | Low-grade (G1)          | <0.001     | 1 (Ref.) |        |         | <0.001       | 1 (Ref.) |        |        |
|                                    | Intermediate-grade (G2) |            | 5.732    | 1.598  | 20.556  |              | 5.947    | 1.654  | 21.381 |

|                            |                 |       |          |       |        |  |        |       |        |
|----------------------------|-----------------|-------|----------|-------|--------|--|--------|-------|--------|
|                            | High-grade (G3) |       | 10.705   | 4.475 | 25.608 |  | 10.524 | 4.363 | 25.385 |
| Perineural invasion        | No              | 0.512 | 1 (Ref.) |       |        |  |        |       |        |
|                            | Yes             |       | 1.793    | 0.313 | 10.278 |  |        |       |        |
| Vascular tumor thrombus    | No              | 0.841 | 1 (Ref.) |       |        |  |        |       |        |
|                            | Yes             |       | 0.862    | 0.201 | 3.701  |  |        |       |        |
| AE1/AE3                    | Negative        | 0.244 | 1 (Ref.) |       |        |  |        |       |        |
|                            | Positive        |       | 2.243    | 0.577 | 8.728  |  |        |       |        |
| Postoperative chemotherapy | No              | 0.623 | 1 (Ref.) |       |        |  |        |       |        |
|                            | Yes             |       | 0.762    | 0.258 | 2.253  |  |        |       |        |
| Postoperative radiotherapy | No              | 0.479 | 1 (Ref.) |       |        |  |        |       |        |
|                            | Yes             |       | 1.929    | 0.313 | 11.870 |  |        |       |        |

CI, confidence interval; HR, hazard ratios; NET, neuroendocrine tumor; NEC, neuroendocrine carcinoma; MANEC, mixed adenoendocrine carcinoma.

**Table SIII.** Univariate and multivariate Cox proportional hazards regression model for overall survival in colorectal neuroendocrine carcinoma.

| Parameter                          | Group                   | Univariate |          |        |         | Multivariate |          |        |        |
|------------------------------------|-------------------------|------------|----------|--------|---------|--------------|----------|--------|--------|
|                                    |                         | P-value    | HR       | 95% CI |         | P-value      | HR       | 95% CI |        |
|                                    |                         |            |          | Low    | High    |              |          | Low    | High   |
| Sex                                | Male                    | 0.032      | 1 (Ref.) |        |         | 0.029        | 1 (Ref.) |        |        |
|                                    | Female                  |            | 2.857    | 1.097  | 7.442   |              | 2.890    | 1.111  | 7.513  |
| Body mass index, kg/m <sup>2</sup> | ≤24.49                  | 0.059      | 1 (Ref.) |        |         |              |          |        |        |
|                                    | >24.49                  |            | 2.531    | 0.966  | 6.628   |              |          |        |        |
| Age, years                         | ≤55                     | 0.019      | 1 (Ref.) |        |         | 0.008        | 1 (Ref.) |        |        |
|                                    | >55                     |            | 3.095    | 1.205  | 7.950   |              | 2.512    | 1.276  | 4.945  |
| Hypertension                       | No                      | 0.748      | 1 (Ref.) |        |         |              |          |        |        |
|                                    | Yes                     |            | 1.267    | 0.300  | 5.349   |              |          |        |        |
| Diabetes                           | No                      | 0.018      | 1 (Ref.) |        |         |              |          |        |        |
|                                    | Yes                     |            | 6.990    | 1.397  | 34.983  |              |          |        |        |
| Primary site                       | Colon                   | 0.625      | 1 (Ref.) |        |         |              |          |        |        |
|                                    | Rectum                  |            | 1.264    | 0.494  | 3.235   |              |          |        |        |
| Gross type                         | Elevated type           | 0.091      | 1 (Ref.) |        |         |              |          |        |        |
|                                    | Ulcerative type         |            | 4.957    | 1.178  | 20.861  |              |          |        |        |
|                                    | Infiltrative type       |            | 2.827    | 0.745  | 10.723  |              |          |        |        |
| Tumor size, cm                     | ≤2                      | 0.834      | 1 (Ref.) |        |         |              |          |        |        |
|                                    | >2                      | 0.587      |          | 0.354  | 6.281   |              |          |        |        |
|                                    | Unknown                 | 0.568      |          | 0.378  | 5.878   |              |          |        |        |
| Histological type                  | NET-G1                  | 0.099      | 1 (Ref.) |        |         |              |          |        |        |
|                                    | NET-G2                  |            | 1.896    | 0.073  | 49.562  |              |          |        |        |
|                                    | NEC-G3                  |            | 12.340   | 0.978  | 155.721 |              |          |        |        |
|                                    | MANEC                   |            | 2.926    | 0.174  | 49.321  |              |          |        |        |
| Differentiation                    | Low-grade (G1)          | <0.001     | 1 (Ref.) |        |         | <0.001       | 1 (Ref.) |        |        |
|                                    | Intermediate-grade (G2) |            | 4.877    | 1.363  | 17.443  |              | 4.791    | 1.326  | 17.303 |
|                                    | High-grade (G3)         |            | 10.299   | 4.307  | 24.624  |              | 7.377    | 2.995  | 18.168 |

|                            |          |       |          |       |        |  |  |  |  |
|----------------------------|----------|-------|----------|-------|--------|--|--|--|--|
| Perineural invasion        | No       | 0.492 | 1 (Ref.) |       |        |  |  |  |  |
|                            | Yes      |       | 1.819    | 0.330 | 10.040 |  |  |  |  |
| Vascular tumor thrombus    | No       | 0.560 | 1 (Ref.) |       |        |  |  |  |  |
|                            | Yes      |       | 0.665    | 0.168 | 2.629  |  |  |  |  |
| AE1/AE3                    | Negative | 0.293 | 1 (Ref.) |       |        |  |  |  |  |
|                            | Positive |       | 2.071    | 0.534 | 8.034  |  |  |  |  |
| Postoperative chemotherapy | No       | 0.404 | 1 (Ref.) |       |        |  |  |  |  |
|                            | Yes      |       | 0.628    | 0.211 | 1.874  |  |  |  |  |
| Postoperative radiotherapy | No       | 0.797 | 1 (Ref.) |       |        |  |  |  |  |
|                            | Yes      |       | 1.301    | 0.175 | 9.655  |  |  |  |  |

CI, confidence interval; HR, hazard ratios; NET, neuroendocrine tumor; NEC, neuroendocrine carcinoma; MANEC, mixed adenoendocrine carcinoma.

**Table SIV.** Clinicopathological characteristics of patients with colorectal neuroendocrine carcinoma of AE1/AE3 expression.

| Parameters                         | Group                   | N          | AE1/AE3(-) | AE1/AE3(+) | P-value             |
|------------------------------------|-------------------------|------------|------------|------------|---------------------|
| Total                              | -                       | 157        | 86         | 71         |                     |
| Sex                                | Male                    | 102 (65.0) | 62 (72.1)  | 40 (56.3)  | 0.059               |
|                                    | Female                  | 55 (35.0)  | 24 (27.9)  | 31 (43.7)  |                     |
| Body mass index, kg/m <sup>2</sup> | ≤24.49                  | 77 (49.0)  | 41 (47.7)  | 36 (50.7)  | 0.828               |
|                                    | >24.49                  | 80 (51.0)  | 45 (52.3)  | 35 (49.3)  |                     |
| Age, years                         | ≤55                     | 75 (47.8)  | 38 (44.2)  | 37 (52.1)  | 0.407               |
|                                    | >55                     | 82 (52.2)  | 48 (55.8)  | 34 (47.9)  |                     |
| Surgical history                   | No                      | 125 (79.6) | 70 (81.4)  | 55 (77.5)  | 0.682               |
|                                    | Yes                     | 32 (20.4)  | 16 (18.6)  | 16 (22.5)  |                     |
| Hypertension                       | No                      | 131 (83.4) | 75 (87.2)  | 56 (78.9)  | 0.237               |
|                                    | Yes                     | 26 (16.6)  | 11 (12.8)  | 15 (21.1)  |                     |
| Diabetes                           | No                      | 141 (89.8) | 81 (94.2)  | 60 (84.5)  | 0.084               |
|                                    | Yes                     | 16 (10.2)  | 5 (5.8)    | 11 (15.5)  |                     |
| Primary site                       | Colon                   | 32 (20.4)  | 22 (25.6)  | 10 (14.1)  | 0.114               |
|                                    | Rectum                  | 125 (79.6) | 64 (74.4)  | 61 (85.9)  |                     |
| Gross type                         | Elevated type           | 72 (45.9)  | 30 (34.9)  | 42 (59.2)  | 0.002 <sup>a</sup>  |
|                                    | Ulcerative type         | 22 (14.0)  | 18 (20.9)  | 4 (5.6)    |                     |
|                                    | Infiltrative type       | 63 (40.1)  | 38 (44.2)  | 25 (35.2)  |                     |
| Tumor size, cm                     | ≤2                      | 81 (51.6)  | 32 (37.2)  | 49 (69.0)  | <0.001              |
|                                    | >2                      | 41 (26.1)  | 27 (31.4)  | 14 (19.7)  |                     |
|                                    | Unknown                 | 35 (22.3)  | 27 (31.4)  | 8 (11.3)   |                     |
| Histological type                  | NET-G1                  | 82 (52.2)  | 29 (33.7)  | 53 (74.6)  | <0.001 <sup>a</sup> |
|                                    | NET-G2                  | 13 (8.3)   | 6 (7.0)    | 7 (9.9)    |                     |
|                                    | NEC-G3                  | 54 (34.4)  | 47 (54.7)  | 7 (9.9)    |                     |
|                                    | MANEC                   | 8 (5.1)    | 4 (4.7)    | 4 (5.6)    |                     |
| Differentiation                    | Low-grade (G1)          | 83 (52.9)  | 30 (34.9)  | 53 (74.6)  | <0.001              |
|                                    | Intermediate-grade (G2) | 16 (10.2)  | 7 (8.1)    | 9 (12.7)   |                     |

|                               |                 |            |           |           |                    |
|-------------------------------|-----------------|------------|-----------|-----------|--------------------|
|                               | High-grade (G3) | 58 (36.9)  | 49 (57.0) | 9 (12.7)  |                    |
| Total number of lymph node    | ≤18             | 37 (23.6)  | 20 (23.3) | 17 (23.9) | 0.994              |
|                               | >18             | 22 (14.0)  | 12 (14.0) | 10 (14.1) |                    |
|                               | Unknown         | 98 (62.4)  | 54 (62.8) | 44 (62.0) |                    |
| Positive number of lymph node | ≤5              | 40 (25.5)  | 19 (22.1) | 21 (29.6) | 0.319              |
|                               | >5              | 19 (12.1)  | 13 (15.1) | 6 (8.5)   |                    |
|                               | Unknown         | 98 (62.4)  | 54 (62.8) | 44 (62.0) |                    |
| TNM stage                     | Tis             | 4 (2.5)    | 3 (3.5)   | 1 (1.4)   | 0.027 <sup>a</sup> |
|                               | I               | 63 (40.1)  | 24 (27.9) | 39 (54.9) |                    |
|                               | II              | 5 (3.2)    | 3 (3.5)   | 2 (2.8)   |                    |
|                               | III             | 28 (17.8)  | 17 (19.8) | 11 (15.5) |                    |
|                               | IV              | 43 (27.4)  | 30 (34.9) | 13 (18.3) |                    |
|                               | Unknown         | 14 (8.9)   | 9 (10.5)  | 5 (7.0)   |                    |
| Perineural invasion           | No              | 145 (92.4) | 82 (95.3) | 63 (88.7) | 0.106 <sup>a</sup> |
|                               | Yes             | 12 (7.6)   | 4 (4.7)   | 8 (11.3)  |                    |
| Vascular tumor thrombus       | No              | 134 (85.4) | 72 (83.7) | 62 (87.3) | 0.683              |
|                               | Yes             | 23 (14.6)  | 14 (16.3) | 9 (12.7)  |                    |
| Postoperative chemotherapy    | No              | 119 (75.8) | 59 (68.6) | 60 (84.5) | 0.033              |
|                               | Yes             | 38 (24.2)  | 27 (31.4) | 11 (15.5) |                    |
| Postoperative radiotherapy    | No              | 150 (95.5) | 81 (94.2) | 69 (97.2) | 0.308 <sup>a</sup> |
|                               | Yes             | 7 (4.5)    | 5 (5.8)   | 2 (2.8)   |                    |

<sup>a</sup>Data were analyzed using Fisher's exact test. NET, neuroendocrine tumor; NEC, neuroendocrine carcinoma; MANEC, mixed adenoendocrine carcinoma; TNM, tumor-node-metastasis.
